# Supplementary material for: Sorghum core-derived carbon sheets as electrodes for a lithium-ion capacitor
Source: Royal Society of Chemistry journal article supplement (doi:10.1039/c7ra02279d), 2017-01-01
Supplement: c7ra02279d1.pdf [file c7ra02279d1.pdf]

## Supporting Information for

### **Sorghum core-derived carbon sheets as electrodes for lithium-ion capacitor**

Xiaonan Xu, Yongpeng Cui, Jing Shi,\* Wei Liu, Shougang Chen, Xin Wang, and  
Huanlei Wang\*

*Institute of Materials Science and Engineering, Ocean University of China, Qingdao  
266100, China.*

Email: shijing@ouc.edu.cn (J. Shi); huanleiwang@gmail.com (H. Wang).

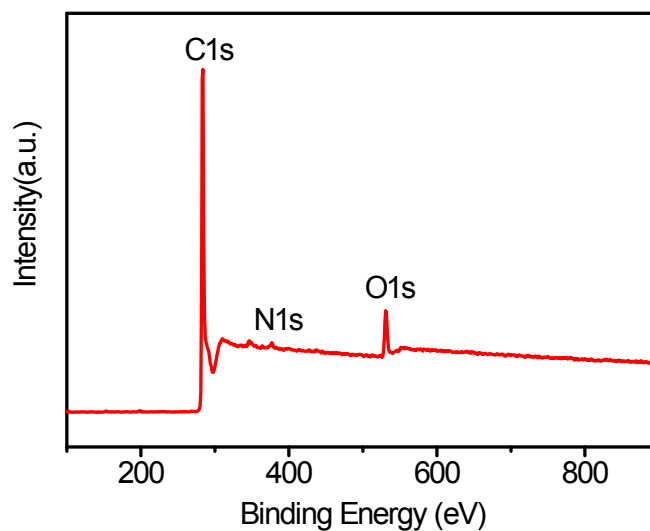

**Fig. S1** XPS spectra of SCDCS.

**Table S1** Physical parameters of SCDCS.

| Sample | $S_{BET}$<br>( $\text{m}^2\text{g}^{-1}$ ) <sup>a</sup> | $V_t$<br>( $\text{cm}^3\text{g}^{-1}$ ) <sup>b</sup> | pore vol (%) <sup>c</sup> |                    |                   | $d_{002}$<br>(nm) | $L_a$<br>(nm) | $L_c$<br>(nm) | $I_G/I_D$ | XPS composition (at%) |      |      |
|--------|---------------------------------------------------------|------------------------------------------------------|---------------------------|--------------------|-------------------|-------------------|---------------|---------------|-----------|-----------------------|------|------|
|        |                                                         |                                                      | $V_{<1\text{nm}}$         | $V_{1-2\text{nm}}$ | $V_{>2\text{nm}}$ |                   |               |               |           | C                     | N    | O    |
|        |                                                         |                                                      |                           |                    |                   |                   |               |               |           |                       |      |      |
| SCDCS  | 1122                                                    | 0.65                                                 | 31.62                     | 28.13              | 40.25             | 0.35              | 0.73          | 0.61          | 0.56      | 93.82                 | 0.29 | 5.89 |

<sup>a</sup> Specific surface area was calculated by Brunauer-Emmett-Teller (BET) method.

<sup>b</sup> The total pore volume was determined by density functional theory (DFT) method.

<sup>c</sup> The volume proportions of pores smaller than 1 nm ( $V_{<1\text{nm}}$ ), pores between 1 and 2 nm ( $V_{1-2\text{nm}}$ ), and pores larger than 2 nm ( $V_{>2\text{nm}}$ ) were also obtained by DFT analysis.

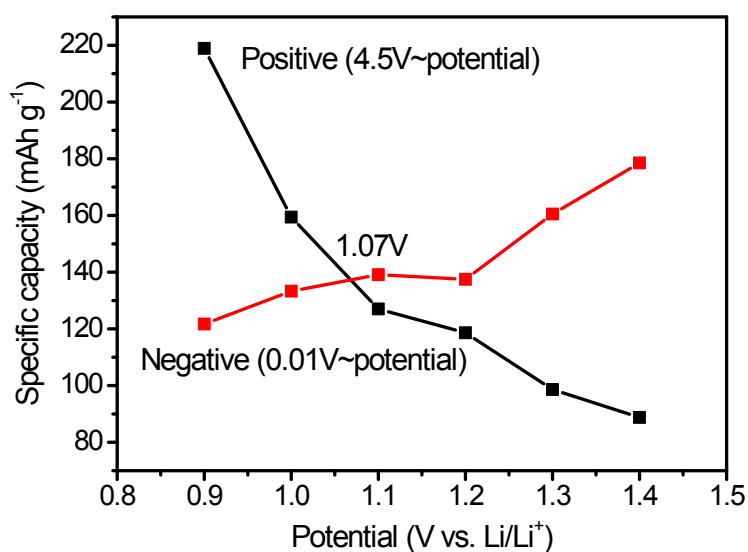

**Fig. S2** The specific capacity in different voltage ranges. Positive: the discharge potential range from 4.5 V vs. Li/Li<sup>+</sup> to 1.4 V vs. Li/Li<sup>+</sup>~0.9 V vs. Li/Li<sup>+</sup>. Negative: the charge potential range from 0.01V vs. Li/Li<sup>+</sup> to 0.9 V vs. Li/Li<sup>+</sup>~1.4 vs. Li/Li<sup>+</sup>. At the desired voltage, which is 1.07 V vs. Li/Li<sup>+</sup>, both of positive and negative electrodes have equal capacity.

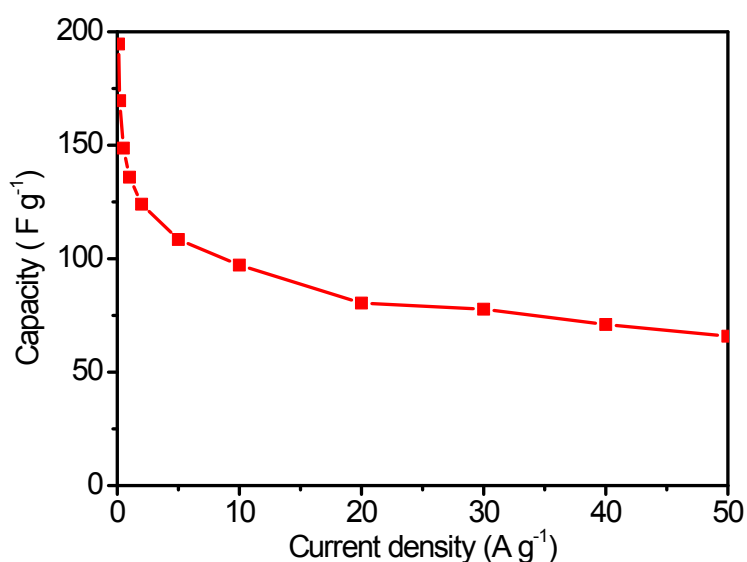

**Fig. S3** Specific capacitance at current density ranging from 0.1 to 50 A g<sup>-1</sup>.

**Table S2** Some recent reports on the performance of lithium ion capacitors.

| Sample                                                                     | Energy density                                               | Power density                                              | Cycling stability                              | Voltage | Ref.      |
|----------------------------------------------------------------------------|--------------------------------------------------------------|------------------------------------------------------------|------------------------------------------------|---------|-----------|
| SCDCS//SCDCS                                                               | 124.8 W h kg <sup>-1</sup><br>at 107.4 W kg <sup>-1</sup>    | 10507.9 W kg <sup>-1</sup><br>at 59.5 W h kg <sup>-1</sup> | 66%, 5000 cycles<br>(10 A g <sup>-1</sup> )    | 0-4.3V  | This work |
| SFAC//SFAC                                                                 | 83 W h kg <sup>-1</sup><br>at 128 W kg <sup>-1</sup>         | 5718 W kg <sup>-1</sup><br>at 41 W h kg <sup>-1</sup>      | 88%, 5000 cycles<br>(1 A g <sup>-1</sup> )     | 2-4V    | 1         |
| MFC//3DaC                                                                  | 157 W h kg <sup>-1</sup><br>at 200 W kg <sup>-1</sup>        | 20000 W kg <sup>-1</sup><br>at 58 W h kg <sup>-1</sup>     | 86.5%, 6000 cycles<br>(2 A g <sup>-1</sup> )   | 0.01-4V | 2         |
| PHPNC//TiC                                                                 | 101.5 W h kg <sup>-1</sup><br>at 450 W kg <sup>-1</sup>      | 67500 W kg <sup>-1</sup><br>at 23.4 W h kg <sup>-1</sup>   | ≈82%, 5000 cycles<br>(2 A g <sup>-1</sup> )    | 0-4.5   | 3         |
| CPIM//AC                                                                   | 28.5 W h kg <sup>-1</sup><br>at 348 W kg <sup>-1</sup>       | 6940 W kg <sup>-1</sup><br>at 13.1 W h kg <sup>-1</sup>    | 97.1%, 5000 cycles<br>(0.5 A g <sup>-1</sup> ) | 2-4V    | 4         |
| HC//AC<br>(LIC-IH)                                                         | 100.5 W h kg <sup>-1</sup><br>at 6200 W kg <sup>-1</sup>     | 7800 W kg <sup>-1</sup><br>at 80.9 W h kg <sup>-1</sup>    | 96.0%, 5000 cycles<br>(2 C)                    | 2-4V    | 5         |
| TiO <sub>2</sub> -rGO//AC                                                  | 42 W h kg <sup>-1</sup><br>at 800 W kg <sup>-1</sup>         | 8000 W kg <sup>-1</sup><br>at 8.9 W h kg <sup>-1</sup>     | 80%, 100 cycles<br>(0.4 A g <sup>-1</sup> )    | 1-3V    | 6         |
| TiO <sub>2</sub> -B //AC                                                   | 23 W h kg <sup>-1</sup>                                      | 2800 W kg <sup>-1</sup>                                    | 73%, 1200 cycles<br>(1.5 A g <sup>-1</sup> )   | 0-2.8V  | 7         |
| Graphene-VN<br>//carbon nanorods                                           | 162 W h kg <sup>-1</sup><br>at 200 W kg <sup>-1</sup>        | 10000 W kg <sup>-1</sup><br>at 64 W h kg <sup>-1</sup>     | ≈83%, 1000 cycles<br>(2 A g <sup>-1</sup> )    | 0-4V    | 8         |
| B-Si/SiO <sub>2</sub> /C//AC                                               | 128 W h kg <sup>-1</sup><br>at 1229 W kg <sup>-1</sup>       | 9704 W kg <sup>-1</sup><br>at 89 W h kg <sup>-1</sup>      | 70%, 6000 cycles<br>(1.6 A g <sup>-1</sup> )   | 2-4.5V  | 9         |
| H <sub>2</sub> Ti <sub>12</sub> -<br>xNb <sub>x</sub> O <sub>25</sub> //AC | 24.3 W h kg <sup>-1</sup><br>at 1794.6 W<br>kg <sup>-1</sup> | 5821.3 W kg <sup>-1</sup><br>at 11.3 W h kg <sup>-1</sup>  | 84%, 1000 cycles<br>(3.0 A g <sup>-1</sup> )   | 0-2.8V  | 10        |
| 3D-MnO//CNS                                                                | 184 W h kg <sup>-1</sup><br>at 83 W kg <sup>-1</sup>         | 15000 W kg <sup>-1</sup><br>at 90 W h kg <sup>-1</sup>     | 76%, 5000 cycles<br>(5 A g <sup>-1</sup> )     | 1-4V    | 11        |

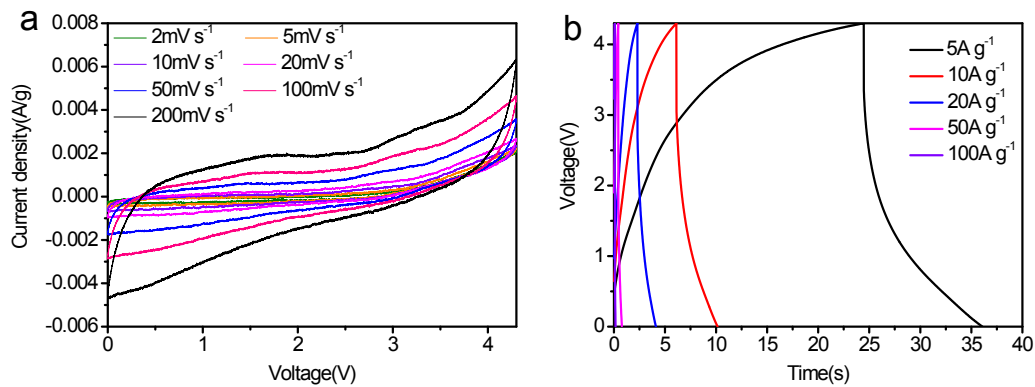

**Fig. S4** (a) CV curves of SCDCS//SCDCS lithium ion capacitor without tuning the potentials at different scan rates. (b) Galvanostatic charge/discharge profiles of SCDCS//SCDCS lithium ion capacitor without tuning the potentials at different current densities.

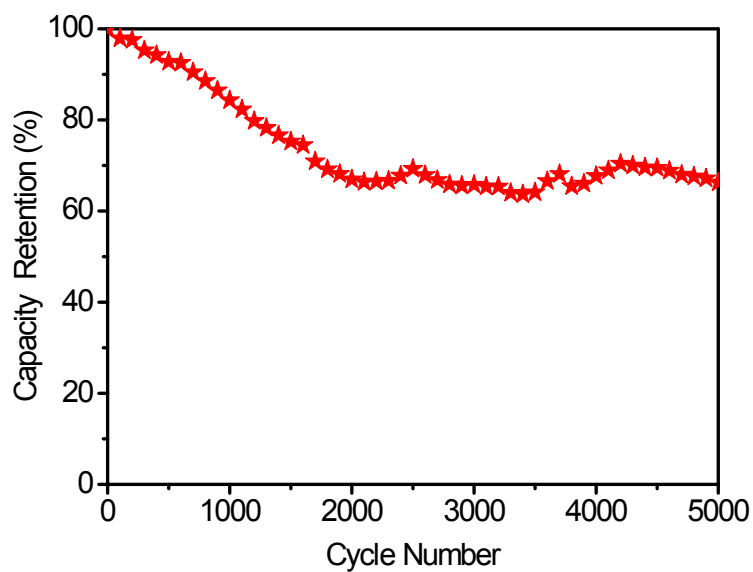

**Fig. S5** Cycling stability of SCDCS//SCDCS lithium ion capacitor measured at 10 A g<sup>-1</sup>.

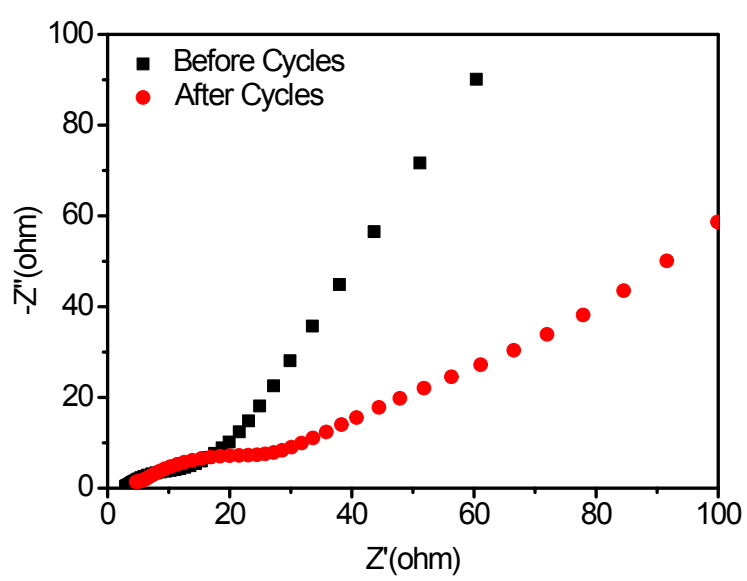

**Fig. S6** Nyquist plots of SCDCS//SCDCS lithium ion capacitors before and after 5000 cycles.

## References

- 1 Z. Yang, H. Guo, X. Li, Z. Wang, Z. Yan and Y. Wang, *J. Power Sources*, 2016, **329**, 339-346.
- 2 W. S. V. Lee, E. Peng, M. Li, X. Huang and J. M. Xue, *Nano Energy*, 2016, **27**, 202-212.
- 3 H. W. Wang, Y. Zhang, H. X. Ang, Y. Q. Zhang, H. T. Tan, Y. F. Zhang, Y. Y. Guo, J. B. Franklin, X. L. Wu, M. Srinivasan, H. J. Fan and Q. Y. Yan, *Adv. Funct. Mater.*, 2016, **26**, 3082-3093.
- 4 X. Han, P. Han, J. Yao, S. Zhang, X. Cao, J. Xiong, J. Zhang and G. Cui, *Electrochim. Acta*, 2016, **196**, 603-610.
- 5 J. Zhang, X. Liu, J. Wang, J. Shi and Z. Shi, *Electrochim. Acta*, 2016, **187**, 134-142.
- 6 H. Kim, M.-Y. Cho, M.-H. Kim, K.-Y. Park, H. Gwon, Y. Lee, K. C. Roh and K. Kang, *Adv. Energy Mater.*, 2013, **3**, 1500-1506.
- 7 V. Aravindan, N. Shubha, W. C. Ling and S. Madhavi, *J. Mater. Chem. A*, 2013, **1**, 6145.
- 8 R. Wang, J. Lang, P. Zhang, Z. Lin and X. Yan, *Adv. Funct. Mater.*, 2015, **25**, 2270-2278.
- 9 R. Yi, S. Chen, J. Song, M. L. Gordin, A. Manivannan and D. Wang, *Adv. Funct. Mater.*, 2014, **24**, 7433-7439.
- 10 J. H. Lee, H.-K. Kim, E. Baek, M. Pecht, S.-H. Lee and Y.-H. Lee, *J. Power Sources*, 2016, **301**, 348-354.
- 11 H. Wang, Z. Xu, Z. Li, K. Cui, J. Ding, A. Kohandehghan, X. Tan, B. Zahiri, B. C. Olsen, C. M. Holt and D. Mitlin, *Nano Lett.*, 2014, **14**, 1987-1994.
